# Supplementary material for: There Is Strength in Numbers: Quantitation of Fc Gamma Receptors on Murine Tissue-Resident Macrophages
Source: Int J Mol Sci. 2021 Nov 10;22(22):12172. doi: 10.3390/ijms222212172 (PMC8620503; doi:10.3390/ijms222212172)
Supplement: Supplementary file 1 [file ijms-22-12172-s001.zip › Supplementary Table S1.pdf]

**Supplementary Table S1:** List of fluorochrome-conjugated antibodies used in this work.

| antigen                 | clone       | isotype             | fluorochrome          | final dilution [1:x] | manufacturer   |
|-------------------------|-------------|---------------------|-----------------------|----------------------|----------------|
| CD3e                    | 145-2C11    | Arm. hamster IgG1 k | Pacific Blue™         | 100                  | Biolegend      |
| CD11b                   | M1/70       | rat IgG2b k         | PerCP-Cy5.5           | 1000                 | Biolegend      |
| CD11c                   | N418        | Arm. hamster IgG    | PE-Cy7                | 400                  | Biolegend      |
| CD11c                   | HL3         | Arm. Hamster        | APC                   | 300                  | BD Biosciences |
| CD16 (FcγRIII)          | S17014E     | rat IgG2a k         | PE                    | 10                   | Biolegend      |
| CD16.2 (FcγRIV)         | 9E9         | Arm. hamster IgG    | PE                    | 80                   | Biolegend      |
| CD19                    | 6D5         | rat IgG2a k         | Pacific Blue™         | 100                  | Biolegend      |
| CD32b (FcγRIIb)         | AT130.2     | mouse IgG2a k       | PE                    | 10                   | Invitrogen     |
| CD45                    | 30-F11      | rat IgG2b k         | Brilliant Violet 510™ | 300                  | Biolegend      |
| CD45                    | A20         | mouse IgG2a k       | Brilliant Violet 510™ | 300                  | BioLegend      |
| CD64 (FcγRI)            | X54-5/7.1   | mouse IgG1 k        | PE                    | 10                   | Biolegend      |
| CD86                    | GL-1        | rat IgG2a k         | FITC                  | 100                  | BioLegend      |
| CD102                   | 3C4         | rat IgG2a k         | Alexa Fluor® 488      | 100                  | BioLegend      |
| CD169                   | 3D6.112     | rat IgG2a k         | PE-Cy7                | 100                  | Biolegend      |
| CD206                   | C068C2      | rat IgG2a k         | Alexa Fluor® 647      | 100                  | BioLegend      |
| CD207 (Langerin)        | 4C7         | mouse IgG2a k       | APC                   | 100                  | Biolegend      |
| F4/80                   | BM8         | rat IgG2a           | APC/Fire750™          | 100                  | Biolegend      |
| F4/80                   | BM8         | rat IgG2a           | PE-Cy7                | 100                  | Biolegend      |
| Gr-1                    | RB6-8C5     | rat IgG2a k         | Pacific Blue™         | 400                  | BioLegend      |
| Ly6C                    | HK1.4       | rat IgG2a k         | APC                   | 200                  | BioLegend      |
| Ly6G                    | 1A8         | rat IgG2a           | Alexa Fluor® 488      | 1000                 | Biolegend      |
| MerTK                   | REA477      | rec. hIgG1          | PE-Cy7                | 200                  | BioLegend      |
| MHC II I-A/I-E          | M5/114.15.2 | rat IgG2b k         | Alexa Fluor® 647      | 200                  | Biolegend      |
| MHC II I-A <sup>b</sup> | AF6-120.1   | mouse IgG2a k       | FITC                  | 300                  | BD Biosciences |
| Siglec-F                | S17007L     | rat IgG2a k         | KIRAVIA Blue 520™     | 200                  | BioLegend      |
| SIGN-R1                 | 22D1        | Arm. hamster        | Alexa Fluor® 647      | 50                   | eBioscience    |
| Tim4                    | F31-5G3     | rat IgG2a k         | Alexa Fluor® 647      | 100                  | BioLegend      |
